# Supplementary material for: Psychological Support Strategies for Adults With Type 2 Diabetes in a Very Low–Carbohydrate Web-Based Program: Randomized Controlled Trial
Source: PubMed Central journal article supplement (PMC10214122; doi:10.2196/44295), 2023-05-11
Supplement: diabetes_v8i1e44295_app2.pdf [file diabetes_v8i1e44295_app2.pdf]

Multimedia Appendix 2. Change in outcomes from baseline to 12 months using intent-to-treat analyses from linear mixed models.

| Outcome                                 | Strategy                                              | Yes, mean change (95% CI) | No, mean change (95% CI) | Yes vs. No mean difference | P value |
|-----------------------------------------|-------------------------------------------------------|---------------------------|--------------------------|----------------------------|---------|
| Change in HbA <sub>1c</sub> (unit of %) |                                                       |                           |                          |                            |         |
|                                         | Daily Dietary Self-Monitoring (Yes/Daily, No/Monthly) | -0.55 (-0.99 to -0.11)    | -1.02 (-1.54 to -0.51)   | 0.47                       | 0.44    |
|                                         | Mindful Eating (Yes, No)                              | -0.90 (-1.37 to -0.43)    | -0.67 (-1.16 to -0.18)   | -0.23                      | 0.84    |
|                                         | Positive Affect (Yes, No)                             | -0.61 (-1.07 to -0.15)    | -0.96 (-1.45 to -0.46)   | 0.35                       | 0.84    |
| Change in Body Weight (lbs)             |                                                       |                           |                          |                            |         |
|                                         | Daily Dietary Self-Monitoring (Yes, No)               | -14.27 (-19.44 to -9.11)  | -15.74 (-22.32 to -9.16) | 1.47                       | 0.91    |
|                                         | Mindful Eating (Yes, No)                              | -15.63 (-21.32 to -9.94)  | -14.39 (-20.52 to -8.25) | -1.24                      | 0.77    |
|                                         | Positive Affect (Yes, No)                             | -16.21 (-21.81 to -10.61) | -13.81 (-20.02 to -7.59) | -2.4                       | 0.55    |
| Change in Depressive symptoms (PHQ-8)   |                                                       |                           |                          |                            |         |
|                                         | Daily Dietary Self-Monitoring (Yes, No)               | -2.65 (-4.01 to -1.29)    | -3.64 (-5.30 to -1.99)   | 0.99                       | 0.48    |
|                                         | Mindful Eating (Yes, No)                              | -3.34 (-4.81 to -1.87)    | -2.96 (-4.52 to -1.39)   | -0.38                      | 0.38    |
|                                         | Positive Affect (Yes, No)                             | -3.87 (-5.32 to -2.41)    | -2.43 (-4.00 to -0.85)   | -1.44                      | 0.52    |

Note: The P values are for the mean differences between receiving and not receiving the behavioral factor.
